# Supplementary material for: First principles design of two dimensional TiSSe Janus drug delivery system for nitrosourea
Source: Royal Society of Chemistry journal article supplement (doi:10.1039/d4ra05119j), 2024-01-01
Supplement: d4ra05119j1.pdf [file d4ra05119j1.pdf]

## First principles design of two dimensional TiSSe Janus drug delivery system for Nitrosourea

Diwei Shi<sup>a\*</sup>, Zhengwei Yan<sup>b</sup>

*a. School of Naval Architecture and Maritime, Zhejiang Ocean University, Zhoushan, Zhejiang  
316022, People's Republic China*

*b. School of Mechanical Engineering, Nantong Institute of Technology*

\*Correspondence to: [shidiwei@zjou.edu.cn](mailto:shidiwei@zjou.edu.cn)

Table S1. Convergence tests for different energies, k-points, and cut-off energies

| system energy<br>(eV) | cutoff energy<br>300 eV | cutoff energy<br>500 eV | cutoff energy<br>550 eV | cutoff energy<br>600 eV |
|-----------------------|-------------------------|-------------------------|-------------------------|-------------------------|
| k-mesh 1×1×1          | -345.145                | -345.023                | -344.985                | -345.010                |
| k-mesh 3×3×1          | -346.096                | -346.027                | -346.044                | -346.073                |
| k-mesh 5×5×1          | -346.197                | -346.141                | -346.145                | -346.174                |

Table S2. The contribution of vdW interaction energy to stress in the z-axis direction.

| configuration | vdW on Z direction<br>(eV) |
|---------------|----------------------------|
| a             | -0.782                     |
| b             | -1.297                     |
| c             | -2.291                     |
| d             | -0.851                     |
| e             | -1.276                     |
| f             | -2.232                     |
